# Title page

1

2

3 **Prevalence and factors associated with sarcopenia among older adults in a**  
4 **post-acute hospital in Singapore**

5

6 Tan You Mei Charmaine MMED (Fam Med)<sup>1,2</sup>, Sharna Seah Si Ying Ph.D. (Public  
7 Health)<sup>3</sup>, Lim Yanshan Doris Msc AdvPT<sup>4</sup>, Koh Siew Van BAppSc (OT)<sup>4</sup>, Ganeshan  
8 Karthikeyan BPT<sup>4</sup>, Xia Jiawen Olivia MSA (Data and Analytics)<sup>3</sup>, Low Xuan Lin DPHM<sup>5</sup>,  
9 Quek Hui Yi GCE-A<sup>6</sup>, Ong Shuyi Andrea MD<sup>1</sup>, A/Prof Low Lian Leng (Fam Med)  
10 FCFP(S)<sup>1,2</sup>, Aw Junjie MMED (Fam Med) FCFP(S)<sup>1,2</sup>

11

12 <sup>1</sup> Post-Acute and Continuing Care Department, Outram Community Hospital,  
13 SingHealth Community Hospitals, Singapore

14 <sup>2</sup> SingHealth Duke-NUS Family Medicine Academic Clinical Program, Singapore

15 <sup>3</sup> Research and Translational Innovation Office, SingHealth Community Hospitals,  
16 Singapore

17 <sup>4</sup> Rehabilitation Department, Outram Community Hospital, SingHealth Community  
18 Hospitals, Singapore

19 <sup>5</sup> Department of Health and Social Science, Singapore Institute of Technology,  
20 Singapore

21 <sup>6</sup> Department of Biological Sciences, National University of Singapore, Singapore

22

23 Corresponding author: Dr. Aw Junjie. [aw.junjie@singhealth.com.sg](mailto:aw.junjie@singhealth.com.sg)

24 Word count abstract: 213

25 Word count "Main text": 3290

NOTE: This preprint reports new research that has not been certified by peer review and should not be used to guide clinical practice.

26

27 Funding source:

28 This study was funded by the 2021 SingHealth Regional Health System (RHS):  
29 Population-based, Unified, Learning System for Enhanced and Sustainable Health  
30 (PULSES) Grant ID: CGOCT21S06.

31

32 Impact statement: Our study found that 1 in 2 older adults are sarcopenic and 1 in 3  
33 older adults are severely sarcopenia in the post-acute settings with associations to  
34 increased age, male sex, low physical activity, cognitive impairment and inverse  
35 associations with higher BMI and hip circumference.

36

37 **Key points:**

38 1) One in two older adults are sarcopenic and one in three older adults are severely  
39 sarcopenic in a post-acute setting, indicating a high prevalence of sarcopenia and  
40 underscoring the urgency to address sarcopenia now.

41 2) Age, sex, physical activity, hip circumference and BMI are associations with  
42 sarcopenia. In addition, cognition is also associated with severe sarcopenia.

43 3) This is the first inpatient study in Singapore looking at sarcopenia associations and  
44 it lends support to global literature on associations of sarcopenia and allows for  
45 possible interventions to target modifiable risk factors in sarcopenia.

46

47 Word count "key points": 93

48

49 **Abstract**

50 **Background:**

51 Sarcopenia is common in older adults worldwide, but its prevalence varies widely  
52 owing to differences in diagnostic criteria, population sampled, and care setting. We  
53 aimed to determine the prevalence and factors associated with sarcopenia in  
54 patients aged 65 and above admitted to a post-acute hospital in Singapore.

55

56 **Methods:**

57 This was a cross-sectional study of 400 patients recruited from a community hospital  
58 in Singapore. Data including socio-demographics, physical activity, nutritional status,  
59 cognition, clinical and functional status, as well as anthropometric measurements  
60 were collected. Sarcopenia was defined using the Asian Working Group for  
61 Sarcopenia 2019 criteria (AWGS2019).

62

63 **Results:**

64 Of the 383 patients with complete datasets, overall prevalence of sarcopenia was  
65 54% while prevalence of severe sarcopenia was 38.9%. Participants with increased  
66 age, male gender and a low physical activity level were more likely to be sarcopenic,  
67 while those with higher hip circumference and higher BMI of  $\geq 27.5$  m/kg<sup>2</sup> were less  
68 likely to be sarcopenic. Other than the above-mentioned variables, cognitive  
69 impairment was also associated with severe sarcopenia.

70

71 **Conclusions:**

72 There is a high prevalence of sarcopenia in older patients admitted to a post-acute  
73 hospital in Singapore. There is an urgent need to address this important clinical  
74 syndrome burden and to identify patients at higher risk of sarcopenia in post-acute  
75 settings in Singapore for early intervention.

76 Word count “abstract”: 213

77 **Main text**

78

79 Introduction

80 The proportion of older adults worldwide is rapidly growing, with projected doubling  
81 by 2050.(1) 16.6% of Singapore’s residents were aged 65 and above in 2022, and this  
82 is rising 4-5.6% year on year.(2) Increased life expectancy globally is not equitable with  
83 healthy life expectancy.(3) Echoing this, the United Nations General Assembly has  
84 declared 2021-2030 the Decade of Healthy Ageing.(4) Increased age is associated with  
85 frailty and sarcopenia.(5-8) These geriatric syndromes herald increased healthcare  
86 utilization and costs from associated morbidity and mortality.(9-12) Among inpatients  
87 undergoing rehabilitation, sarcopenia had been reported to be associated with worse  
88 recovery of function and lower rate of home discharge in hospitalized adults  
89 undergoing rehabilitation.(13)

90

91 Sarcopenia is common in older adults worldwide, but it’s prevalence varies widely  
92 owing to differences in diagnostic criteria, population sampled, and care setting.(14)  
93 Sarcopenia prevalence reported in overseas studies was 26.9 – 58% in inpatient post-  
94 acute and rehabilitation wards and 50.9 - 60.2% in daycare facilities.(11, 15-18)  
95 Sarcopenia has been reported to be associated with age, gender, marital status,  
96 comorbidities, smoking, physical activity, BMI, waist circumference, hip  
97 circumference, nutrition, and cognition.(13, 15-24)

98

99 Several studies in Singapore had reported sarcopenia prevalence among varying  
100 population groups in the community.

101

102 For example, sarcopenia prevalence in a community sample of individuals aged 21-90  
103 years old compared to those aged 60 years and above was 13.6% and 32.2%  
104 respectively.(21) Another study reported sarcopenia prevalence of 76% among  
105 community ambulant adults aged 65 and above who were at medium or high risk of  
106 malnutrition.(22) The prevalence of sarcopenia in primary care and specialist  
107 outpatient clinics ranged from 27.4% in patients aged 60-89 years old with Type 2  
108 Diabetes Mellitus using AWGS criteria, to 44% in patients aged 65 and above based  
109 on SARC-F questionnaire only.(19, 25)

110

111 However, till date there is none investigating sarcopenia prevalence using established  
112 recommended criteria in the inpatient setting. We aim to determine the prevalence  
113 of sarcopenia, severe sarcopenia and their associations in an inpatient post-acute  
114 hospital setting in Singapore.

115

## 116 Materials and Methods

### 117 Setting

118 This cross-sectional study was conducted from May to November 2022 at Outram  
119 Community Hospital (OCH).

120 A community hospital in Singapore is a purpose built hospital to provide medical,  
121 nursing and rehabilitation care for patients who require a short period of continuation  
122 of care after their stay in the acute hospitals i.e. post-acute care before being  
123 discharged into the community.(26)

124 Admissions into OCH come from the Singapore General Hospital (SGH), the largest co-  
125 located acute tertiary hospital in Singapore servicing the southeastern region of  
126 Singapore.

127

## 128 Study participants and recruitment

129 All patients aged 65 years old and above admitted to OCH under subacute or  
130 rehabilitation service from 17 May to 16 November 2022 were consecutively screened  
131 based on eligibility criteria. Participants who were unable to understand English or  
132 Mandarin, refused to participate, or unable to give informed consent or follow  
133 instructions due to conditions such as neuropsychiatric or neurocognitive disease  
134 were excluded. Additional excluded participants included those who were terminally  
135 ill; medically unstable; had conditions which precluded sarcopenia assessment such  
136 as anyone with a cardiac pacemaker, an implantable defibrillator, amputation of  
137 limb(s), intravenous hydration, fluid overload and had temporary restrictions in  
138 weightbearing status of upper or lower limbs.

139

140 Eligible participants were then recruited after written informed consent was obtained.  
141 All participants recruited were assigned to a unique serial number in order to delink  
142 and deidentify them. All data was collected during the inpatient stay in OCH, with no  
143 further follow-up or contact after discharge.

144

145 This study was approved by SingHealth Centralized Institutional Review board (CIRB  
146 Ref 2021/2817).

147

## 148 Data Collection

149 All interviewers received standardized training on interview techniques with trial  
150 interviews held with trainer to ensure fidelity. Face-to-face interviews with the  
151 patients were conducted in Mandarin and English.

152

153 Data collected included 1) demographics (age, sex, race, marital status, living setup,  
154 type of dwelling and highest educational qualification); 2) physical activity and  
155 sedentary time; 3) nutritional status; 4) cognition; and 5) other clinical parameters  
156 (weight, height, smoking history, Modified Barthel Index (MBI) scores on admission,  
157 Charlson Comorbidity Index (CCI); history of COVID-19 infection; waist circumference  
158 (WC); hip circumference (HC) and Rehabilitation Diagnostic Groups (RDGs)  
159 classification, an administrative framework to group patients admitted for  
160 rehabilitation so as to facilitate transition and collaboration across the stakeholders  
161 in the care spectrum.

162

163 Physical activity level and sedentary time were assessed using the Global Physical  
164 Activity Questionnaire (GPAQ), which was developed by WHO with standardized  
165 approach and question guide available both in English and Mandarin translations, and  
166 used in multiple Singapore studies including the National Health Survey 2010 and  
167 2019.(21, 27-32) As per the GPAQ, participants' sedentary time in minutes per day  
168 and their physical activity level (low and moderate or high) were collected.(33)

169

170 The 3-Minute Nutritional Screening (3-MinNS) tool, developed in Singapore and  
171 validated for medical and surgical inpatients in a Singapore hospital, was used to  
172 screen nutritional status.(34, 35) Participants were grouped into low (0-2), moderate  
173 (3-4), or severe (5-9) malnutrition risk.(34)

174

175 Cognitive assessment was done using the Chinese Mini Mental State Examination  
176 (CMMSE), which was also validated locally in English and Mandarin.(36) Those with  
177 CMMSE scores of 23 and below were considered as having impaired cognition.(37)



178

179 The participants' inpatient medical records were accessed to retrieve information  
180 regarding the following: MBI on admission; CCI; history of COVID-19 infection; RDGs;  
181 weight (in kilogrammes) and height (in metres) on admission.

182

183 Body mass index (BMI) was calculated as body weight divided by square of height  
184 ( $\text{kg}/\text{m}^2$ ). Cut-offs were based on WHO BMI risk categories for cardiovascular disease  
185 and diabetes in Asian populations.(38)

186

### 187 Anthropometry

188 Waist circumference (WC) was measured using a stretch-resistant tape at the  
189 midpoint between the lower margin of the least palpable rib and the top of the iliac  
190 crest. Waist circumference cut-offs were determined as per The International  
191 Diabetes Federation (IDF) consensus worldwide definition for metabolic  
192 syndrome.(39)

193

194 Hip circumference (HC) was measured around the widest portion of the buttocks.(40)  
195 Waist-hip ratio (WHR) was calculated by dividing WC over HC. Cut-offs for WHR were  
196 based on World Health Organization (WHO), redefining obesity - the Asia-Pacific  
197 perspective.(41)

198

### 199 Sarcopenia assessment

200 There have been several proposed diagnostic algorithms for sarcopenia. In 2010, the  
201 European Working Group on Sarcopenia in Older People (EWGSOP) proposed the first  
202 practical clinical definition and diagnostic criteria for sarcopenia based on assessment

203 of muscle mass, muscle strength and physical performance.(42) This was revised in  
204 2018 to EWSOP2, which used low muscle strength as the primary parameter of  
205 sarcopenia.(10) To address differences in cut-off values of measurements in Asian  
206 populations from Europeans, an Asian consensus was derived by the Asian Working  
207 Group for Sarcopenia (AWGS) in 2014 and revised in 2019.(43, 44)

208

209 In our study, sarcopenia was assessed and diagnosed using criteria as per  
210 AWGS2019(44). Sarcopenia was diagnosed in the presence of low muscle mass, with  
211 either low muscle strength or low physical performance (PP). Those with low muscle  
212 mass, low muscle strength, and low PP, were further subclassified as “severe  
213 sarcopenia” for sub-group analyses.(44)

214

#### 215 *Muscle mass*

216 Appendicular skeletal muscle mass (ASM) was determined using a multifrequency  
217 bioelectrical impedance analysis (BIA) InBody S10 Body Composition Monitor. ASMI  
218 was calculated by dividing ASM by height squared ( $\text{kg}/\text{m}^2$ ). BIA measurements were  
219 conducted under standardised protocols i.e. before therapy sessions, in supine  
220 position with limbs abducted and ensuring no contact with metal frame of bed.(45)  
221 Low muscle mass was defined as appendicular skeletal muscle mass index (ASMI)  
222  $<7\text{kg}/\text{m}^2$  in males and  $<5.7\text{kg}/\text{m}^2$  in females.

223

#### 224 *Muscle strength*

225 Muscle strength was assessed via handgrip strength (HGS) which was measured using  
226 a dynamometer (BASELINE 12-0240 standard hydraulic hand dynamometer) in seated  
227 posture, with shoulder adducted and elbow flexed to 90 degrees and forearm in  
228 neutral as recommended by American Society of Hand Therapists.(46) The maximum

229 reading from at least two trials using either hand in a maximum-effort isometric  
230 contraction was used for analysis.(44) Low muscle strength was defined as handgrip  
231 strength (HGS) <28kg in males and <18kg in females.

232

### 233 *Physical Performance*

234 Low PP was defined as gait speed <1.0m/s over 6-metre walk (6mGS), or 5-time chair  
235 stand test (5CST) requiring  $\geq 12$ s, or Short Physical Performance Battery (SPPB) score  
236 of  $\leq 9$ .

237

238 6mGS was measured as time taken to walk 6m at a normal pace from a moving start,  
239 without deceleration, with average of two trials taken as the recorded speed  
240 (m/s)(44). Walking aids were permitted if necessary and documented if it was used.

241 5CST was measured as the time taken to rise and sit five times as quickly as possible  
242 with no contact against the back of the chair and maximal extension of knees(47).

243 SPPB is a 3-part performance-based test of balance, gait speed, and 5CST, with a score  
244 of 0 to 12.

245

### 246 *Statistical analyses*

247 Categorical variables were presented as proportions and continuous variables  
248 summarized as means $\pm$  SD or medians with interquartile ranges [IQR (25th  
249 percentile, 75th percentile)] as appropriate. Pearson chi-square test was used to  
250 compare categorical variables and logistic regression to compare continuous variables  
251 as appropriate for univariate analyses.

252 Multivariate logistics regression was done on all variables investigated to arrive at  
253 adjusted odds ratio with 95% confidence interval (CI) associated with sarcopenia

254 outcomes. Similarly multinomial regression was done on all variables to calculate  
255 adjusted odds ratio associated with severe sarcopenia outcomes.  
256 All analyses were two-tailed and p value <0.05 was considered statistically significant.  
257 Statistical analysis was performed using Stata Version 17 (StataCorp, College Station,  
258 TX, USA).

259

## 260 Results

261 A total of 400 patients were recruited, of which 17 (4%) had incomplete data due to  
262 discharge or transfer to acute hospital for acute medical issues. Hence, 383 (96%)  
263 patients with complete data were analysed in this study. Figure 1 shows the process  
264 of identifying sarcopenia in our study population using AWGS2019 diagnostic  
265 algorithm.

266

### 267 *Prevalence of sarcopenia and severe sarcopenia*

268 Prevalence of sarcopenia using AWGS 2019 criteria in our study population was 54.0%  
269 (n=207) with 66.4% of males being sarcopenic and 45.9% of females being sarcopenic.  
270 Prevalence of severe sarcopenia in our cohort was 38.9% (n=149).

271

### 272 *Characteristics of study population and unadjusted odds ratio*

273 Table 1 illustrates the characteristics of our participants with corresponding  
274 unadjusted odds ratios of sarcopenia. The median age of participants was 75 years  
275 old (IQR: 70-81), with more females (60.3%) than male participants, and majority (93%)  
276 were Chinese. Slightly more than half (56.1%) were currently married. Majority (91.9%)  
277 live in public governmental housing (Housing Development Board (HDB) apartments).  
278 About two thirds (60.4%) of our cohort have less than secondary school education and

279 only 20% of participants were smokers or ex-smokers. 2/3 of our participants had CCI  
280 more than “0”. 62% of participants were not known to be infected by COVID-19 prior  
281 to recruitment into study.

282

283 Slightly more than half (56.4%) were at moderate or high risk of malnutrition. Physical  
284 activity level was evenly distributed with half (50.9%) of the participants assessed to  
285 have low physical activity level. Approximately half of our participants (49.9%) had  
286 CMMSE 23 or less. Slightly over half (57.4%) of participants had BMI of 23kg/m<sup>2</sup> or  
287 more, while approximately 2/3 had an elevated waist circumference and waist-hip  
288 ratio.

289

290 Half (54.1%) of the participants had an MBI score of 0-60 on admission, indicating  
291 severe to total dependency in activities of daily living. Participants were mostly  
292 admitted for rehabilitation (RDG) due to musculoskeletal conditions (48.8%), followed  
293 by deconditioning (18.5%), others (14.4%), hip fracture (11.5%), and stroke (5.1%).

294

295 Table 1: Characteristics of study population and factors associated with sarcopenia on univariate analysis

| Characteristic             | Total<br>(n= 384) | Non-Sarcopenic<br>(n = 176) | Sarcopenia (n<br>=208) | Unadjusted OR (95% CI) |
|----------------------------|-------------------|-----------------------------|------------------------|------------------------|
| Age in years, median (IQR) | 75 (70, 81)       | 74 (69, 78)                 | 77 (72, 82)            | 1.09 (1.06-1.13)       |
| Sex, n (%)                 |                   |                             |                        |                        |
| Male                       | 152 (39.6)        | 51 (29.0)                   | 101 (48.8)             | 2.34 (1.53-3.57)       |
| Female                     | 231 (60.3)        | 125 (71.0)                  | 106 (51.2)             | 1                      |
| Race, n (%)                |                   |                             |                        |                        |
| Chinese                    | 356 (93)          | 160 (90.9)                  | 196 (94.7)             | 1                      |
| Malay                      | 16 (4.2)          | 11 (6.25)                   | 5 (2.4)                | 0.37 (0.13-1.09)       |

|                                                                |            |            |            |                   |
|----------------------------------------------------------------|------------|------------|------------|-------------------|
| Indian                                                         | 8 (2.1)    | 4 (2.27)   | 4 (1.9)    | 0.82 (0.20-3.32)  |
| Others (2 Eurasians, 1 Sikh)                                   | 3 (0.8)    | 1 (0.6)    | 2 (1.0)    | 1.63 (0.15-18.17) |
| Current Marital Status, n (%)                                  |            |            |            |                   |
| Single / Widowed / Divorced / Separated                        | 168 (43.9) | 67 (38.1)  | 101 (48.8) | 1.55 (1.03-2.33)  |
| Currently married                                              | 215 (56.1) | 109 (61.9) | 106 (51.2) | 1                 |
| Living Setup, n (%)                                            |            |            |            |                   |
| Alone                                                          | 85 (22.2)  | 33 (18.8)  | 52 (25.1)  | 1.45 (0.89-2.38)  |
| With someone                                                   | 298 (77.8) | 143 (81.3) | 155 (74.9) | 1                 |
| Housing Type, n (%)                                            |            |            |            |                   |
| HDB (public housing)                                           | 352 (91.9) | 163 (92.6) | 189 (91.3) | 0.89 (0.42-1.88)  |
| Condominium/Landed (private housing)                           | 30 (7.8)   | 13 (7.4)   | 17 (8.2)   | 1                 |
| Others (overseas property)                                     | 1 (0.3)    | 0 (0)      | 1 (0.5)    | -                 |
| Highest Educational Qualification, n (%)*                      |            |            |            |                   |
| Below GCE "N" or "O" levels                                    | 230 (60.4) | 100 (56.8) | 130 (63.4) | 1.32 (0.87-1.99)  |
| GCE "N" or "O" level and above                                 | 151 (39.6) | 76 (43.2)  | 75 (36.6)  | 1                 |
| Smoking history, n (%)                                         |            |            |            |                   |
| Never smoker                                                   | 308 (80.4) | 148 (84.1) | 160 (77.3) | 1                 |
| Ex or Current smoker                                           | 75 (19.6)  | 28 (15.9)  | 47 (22.7)  | 1.55 (0.92-2.61)  |
| Charlson Comorbidity Index, n (%)                              |            |            |            |                   |
| 0                                                              | 130 (33.9) | 72 (40.9)  | 58 (28.0)  | 1                 |
| 1 and 2                                                        | 173 (45.2) | 74 (42.1)  | 99 (47.8)  | 1.66 (1.05-2.63)  |
| 3 and more                                                     | 80 (20.9)  | 30 (17.1)  | 50 (24.2)  | 2.07 (1.17-3.66)  |
| Ever infected by COVID-19 before recruitment into study, n (%) |            |            |            |                   |
| No                                                             | 237 (61.9) | 113 (64.2) | 124 (59.9) | 1                 |
| Yes                                                            | 146 (38.1) | 63 (35.8)  | 83 (40.1)  | 1.20 (0.79-1.82)  |
| Malnutrition Risk n (%)*                                       |            |            |            |                   |

|                                                                                                                |               |               |               |                      |
|----------------------------------------------------------------------------------------------------------------|---------------|---------------|---------------|----------------------|
| No risk                                                                                                        | 170 (44.6)    | 112 (64.0)    | 58 (28.2)     | 1                    |
| Moderate risk                                                                                                  | 124 (32.6)    | 40 (22.9)     | 84 (40.8)     | 4.06 (2.48-6.63)     |
| Severe risk                                                                                                    | 87 (22.8)     | 23 (13.1)     | 64 (31.1)     | 5.37 (3.03-9.52)     |
| Physical Activity, n (%)                                                                                       |               |               |               |                      |
| Low                                                                                                            | 195 (50.9)    | 78 (44.3)     | 117 (56.5)    | 1.63 (1.09-2.45)     |
| Moderate to high                                                                                               | 188 (49.1)    | 98 (55.7)     | 90 (43.5)     | 1                    |
| Sedentary Time in minutes/day, median (interquartile range 25 <sup>th</sup> centile, 75 <sup>th</sup> centile) |               |               |               |                      |
|                                                                                                                | 800 (690-895) | 800 (685-890) | 810 (710-900) | 1.00 (0.9997-1.0022) |
| Cognition, n (%)                                                                                               |               |               |               |                      |
| CMMSE Score 23 and less                                                                                        | 191 (49.9)    | 73 (41.5)     | 118 (57.0)    | 1.87 (1.25-2.81)     |
| CMMSE Score 24 and more                                                                                        | 192 (50.1)    | 103 (58.5)    | 89 (43.0)     | 1                    |
| BMI <sup>a</sup> , kg/m <sup>2</sup> (%)                                                                       |               |               |               |                      |
| Less than 18.5                                                                                                 | 56 (14.6)     | 3 (1.7)       | 53 (25.6)     | 4.31 (1.23-15.17)    |
| 18.5-22.9                                                                                                      | 107 (27.9)    | 21 (11.9)     | 86 (41.6)     | 1                    |
| 23-27.4                                                                                                        | 133 (34.7)    | 74 (42.1)     | 59 (28.5)     | 0.19 (0.11-0.35)     |
| 27.5 and above                                                                                                 | 87 (22.7)     | 78 (44.3)     | 9 (4.4)       | 0.03 (0.01-0.07)     |
| Waist Circumference <sup>b</sup> , cm (%)                                                                      |               |               |               |                      |
| Males ≤90;<br>Females ≤80                                                                                      | 128 (33.4)    | 20 (11.4)     | 108 (51.2)    | 8.51 (4.96-14.59)    |
| Males >90;<br>Females >80                                                                                      | 255 (66.6)    | 156 (88.6)    | 99 (47.8)     | 1                    |
| Hip Circumference in cm, mean (SD)                                                                             |               |               |               |                      |
|                                                                                                                | 94.2 (8.9)    | 99.6 (7.9)    | 89.6 (6.9)    | 0.83 (0.79-0.86)     |
| Waist-Hip Ratio (WHR) <sup>c</sup> , n (%)                                                                     |               |               |               |                      |
| Males 1.0 and below<br>Females 0.85 and below                                                                  | 119 (31.1)    | 35 (19.9)     | 84 (40.6)     | 2.75 (1.73-4.37)     |
| Males more than 1.0<br>Females more than 0.85                                                                  | 264 (68.9)    | 141 (80.1)    | 123 (59.4)    | 1                    |
| MBI score on admission, n (%)                                                                                  |               |               |               |                      |

|                                                             |            |            |            |                  |
|-------------------------------------------------------------|------------|------------|------------|------------------|
| MBI 0-60<br>(severe to total dependency)                    | 207 (54.1) | 80 (45.5)  | 127 (61.4) | 1.91 (1.27-2.86) |
| MBI 61-100 (moderate dependency to functional independence) | 176 (46.0) | 96 (54.6)  | 80 (38.7)  | 1                |
| Admission RDG, n (%)                                        |            |            |            |                  |
| Deconditioning                                              | 71 (18.5)  | 16 (9.1)   | 55 (26.6)  | 5.25 (2.80-9.85) |
| Others (e.g. IV antibiotics, wound care, malignancy)        | 55 (14.4)  | 16 (9.1)   | 39 (18.8)  | 3.72 (1.94-7.14) |
| Stroke                                                      | 26 (6.8)   | 9 (5.1)    | 17 (8.2)   | 2.88 (1.22-6.81) |
| Hip fracture                                                | 44 (11.5)  | 22 (12.5)  | 22 (10.6)  | 1.53 (0.79-2.95) |
| Musculoskeletal conditions                                  | 187 (48.8) | 113 (64.2) | 74 (35.8)  | 1                |

296  
297  
298  
299  
300

<sup>a</sup> Cut-offs as per WHO BMI risk categories for cardiovascular disease and diabetes in Asian populations  
<sup>b</sup> Cut-offs as per IDF  
<sup>c</sup> Cut-offs as per WHO  
<sup>#</sup> p-value required for significance after Bonferroni correction is 0.0083  
\*missing data n=2

301

### 302 *Factors associated with sarcopenia*

303 Older age [OR 1.06 (1.01-1.12)], male sex [OR 2.80 (1.12-7.02)] and low physical  
304 activity [OR 2.13 (1.17-3.89)] were associated with sarcopenia. Higher BMI more than  
305 or equal to 27.5 [OR 0.16 (0.05-0.52)] and greater hip circumference [OR 0.86 (0.81-  
306 0.92)] are inversely associated with sarcopenia (Table 2).

307 Table 2: Multivariable analysis on variables associated with sarcopenia

| Characteristic          | Adjusted OR (95% CI) |
|-------------------------|----------------------|
| Age, years              | 1.06 (1.01-1.12)     |
| Sex                     |                      |
| Male                    | 2.80 (1.12-7.02)*    |
| Female                  | 1                    |
| BMI, kg/m <sup>2</sup>  |                      |
| <18.5                   | 2.34 (0.56-9.67)     |
| 18.5-22.9               | 1                    |
| 23-27.4                 | 0.53 (0.24-1.16)     |
| 27.5 and above          | 0.16 (0.05-0.52)***  |
| HC, cm                  | 0.86 (0.81-0.92)***  |
| Physical Activity level |                      |
| Low                     | 2.13 (1.17-3.89)*    |
| Moderate to High        | 1                    |



308 P values: \* <0.05; \*\* <0.01; \*\*\* <0.001

309

310 *Factors associated with severe sarcopenia*

311 Among the variables investigated, severe sarcopenia in our setting is associated with

312 age [OR 1.10 (1.03-1.16)], males [OR 4.35 (1.5-12.64)], low physical activity [OR 2.78

313 (1.34-5.79)], and cognitive impairment with MMSE 23 or less [OR 2.26 (1.01-5.02)].

314 Higher BMI more than or equal to 27.5 [OR 0.20 (0.05-0.75)] and greater hip

315 circumference [OR 0.84 (0.78-0.91)] are inversely associated with sarcopenia (Table

316 3).

317 Table 3 Multinomial regression on association factors with sarcopenia and severe sarcopenia

| Variables                             | Sarcopenia             |         |
|---------------------------------------|------------------------|---------|
|                                       | Adjusted OR (95% C.I.) | p-value |
| Age                                   | 0.99 (0.93-1.06)       | 0.829   |
| Sex                                   |                        |         |
| Male                                  | 1.57 (0.45-5.43)       | 0.476   |
| Female                                | Reference              |         |
| Race                                  |                        |         |
| Chinese                               | -                      |         |
| Malay                                 | -                      |         |
| Indian                                | Reference              |         |
| Others (2 Eurasians, 1 Sikh)          | -                      |         |
| Current Marital Status                |                        |         |
| Single/Widowed/Divorced/Separated     | 1.46 (0.60-3.56)       | 0.405   |
| Married                               | Reference              |         |
| Living Setup                          |                        |         |
| Alone                                 | -                      |         |
| With Tenant / Friend                  | Reference              |         |
| With Family / Caregiver               | -                      |         |
| Highest Educational Qualification*    |                        |         |
| Below GCE "N" or "O" levels           | 1.81 (0.76-4.33)       | 0.182   |
| GCE "N" or "O" level and above        | Reference              |         |
| Smoking history                       |                        |         |
| Never smoker                          | Reference              |         |
| Ex or Current smoker                  | 1.09 (0.38-3.12)       | 0.877   |
| BMI                                   |                        |         |
| Less than 18.5                        | 2.37 (0.42-13.34)      | 0.329   |
| 18.5-22.9                             | Reference              |         |
| 23-27.4                               | 0.52 (0.20-1.41)       | 0.2     |
| 27.5 and above                        | 0.08 (0.01-0.50)       | 0.007   |
| Waist Circumference <sup>a</sup> , cm |                        |         |

|                                                         |                   |       |
|---------------------------------------------------------|-------------------|-------|
| Males ≤90;                                              | 0.39 (0.11-1.37)  | 0.142 |
| Females ≤80                                             |                   |       |
| Males >90;                                              | Reference         |       |
| Females >80                                             |                   |       |
| Hip Circumference in cm                                 | 0.86 (0.78-0.94)  | 0.001 |
| Waist-Hip Ratio (WHR) <sup>b</sup>                      |                   |       |
| Males 1.0 and below                                     | 1.69 (0.45-6.31)  | 0.432 |
| Females 0.85 and below                                  |                   |       |
| Males more than 1.0                                     | Reference         |       |
| Females more than 0.85                                  |                   |       |
| Physical Activity <sup>c</sup>                          |                   |       |
| Low                                                     | 1.57 (0.71-3.48)  | 0.263 |
| Moderate to high                                        | Reference         |       |
| Sedentary Time in minutes/day                           | 1.00 (1.00-1.00)  | 0.136 |
| Malnutrition Risk                                       |                   |       |
| No risk                                                 | Reference         |       |
| Moderate risk                                           | 1.05 (0.44-2.53)  | 0.91  |
| Severe risk                                             | 0.75 (0.26-2.20)  | 0.603 |
| MMSE                                                    |                   |       |
| Score 23 and less                                       | 1.28 (0.54-3.04)  | 0.579 |
| Score 24 and more                                       | Reference         |       |
| Charlson Comorbidity Index                              |                   |       |
| 0                                                       | Reference         |       |
| 1 and 2                                                 | 0.81 (0.34-1.96)  | 0.642 |
| 3 and more                                              | 0.95 (0.30-3.00)  | 0.928 |
| Ever infected by COVID-19 before recruitment into study |                   |       |
| No                                                      | Reference         |       |
| Yes                                                     | 0.89 (0.41-1.94)  | 0.778 |
| RDG group <sup>d</sup>                                  |                   |       |
| Others (IV antibiotics, wound care, malignancy)         | 4.84 (1.07-22.03) | 0.041 |
| Stroke                                                  | 4.39 (0.77-23.83) | 0.095 |
| Hip fracture                                            | Reference         |       |
| Musculoskeletal conditions                              | 2.57 (0.71-9.28)  | 0.149 |
| Deconditioning                                          | 1.04 (0.20-5.42)  | 0.959 |
| MBI score on admission                                  |                   |       |
| MBI 0-60                                                | 1.47 (0.67-3.22)  | 0.342 |
| MBI 61-100                                              | Reference         |       |

318

319

<sup>a</sup>cut-offs for waist circumference as per HPB Asia Pacific Consensus and International Diabetes Federation

320

<sup>b</sup>cut-offs for WHC as per WHO classification of abdominal fatness

321 <sup>c</sup>as assessed using WHO GPAQ

322 <sup>d</sup>Rehab Diagnostic Groups

323 \*missing data n=2

324

## 325 Discussion

326 We found a high prevalence of sarcopenia in an inpatient post-acute rehabilitation  
327 setting in Singapore. In addition, what is worrisome is that severe sarcopenia is highly  
328 prevalent with 1 in 3 inpatients having severe sarcopenia. Our sarcopenia prevalence  
329 is in keeping with worldwide literature where such post-acute units have the highest  
330 prevalence of sarcopenia followed by nursing home residents, then hospitalized older  
331 adults and lowest in community dwelling older adults.(48) This confirms the burden  
332 of disease in units performing rehabilitation and suggests that patients should be  
333 intervened earlier upstream even before they are being referred or admitted to such  
334 settings. There is also a certain urgency to identify this group of patients for further  
335 study and conduct interventions with the aim to reverse the sarcopenia.

336

337 Like many studies, we found that ageing is associated with sarcopenia.(21-23, 49) This  
338 is in keeping with the observation where older adults lose muscle mass with increasing  
339 age with intramuscular and intermuscular fat infiltration.(50-53) Many underlying  
340 hypotheses for this had been proposed including role of chronic inflammation,  
341 intracellular biochemical pathways, concurrent metabolic chronic diseases more  
342 prevalent in older adults leading to the onset of sarcopenia.(54, 55) However,  
343 interesting developments looking at birth weights and later onset sarcopenia seem to  
344 hint at other factors that go beyond ageing as contributory factors for sarcopenia,  
345 setting the stage for a comprehensive review at reversing sarcopenia at all levels.(56,  
346 57)

347 Most global literature found a significant association between males and sarcopenia  
348 like our study although there are some studies showed an association between  
349 females and sarcopenia instead.(18, 19, 21, 22) Nonetheless, this highlights likely  
350 unique gender differences in developments of sarcopenia.(21, 58) It has been  
351 postulated that myostatin causing catabolism in males and reduced IGF-1 leading to  
352 anabolic decline in females have a role in the sex differences in sarcopenia  
353 development.(59, 60) Other clinical parameters such as men losing muscle strength  
354 and testosterone faster than women also support the association of men being at  
355 higher odds of sarcopenia than women.(61-65) Future trials are needed to formulate  
356 sex specific interventions tailored to reverse sarcopenia so as to conclusively  
357 determine the causal effects of these associations.

358

359 Consistent with literature, low physical activity has an inverse association with muscle  
360 mass and higher odds of sarcopenia.(66-68) What remains debatable is designing an  
361 evidence-based exercise regime to reverse sarcopenia. The differential role of aerobic,  
362 resistance training and a combination of the types of physical activity may play  
363 different roles in preventing or reversing sarcopenia.(69) Incorporating the right mix  
364 for the best effect is currently a knowledge gap worth studying in the future.

365

366 Higher hip circumference being a surrogate measure of gluteal musculature is  
367 understandably inversely associated with sarcopenia.(19, 70-72) In addition, our  
368 study finds that a higher BMI is also protective of sarcopenia similar to other  
369 studies.(18, 73-75)

370 There may be a few explanations for the above. Firstly, a higher BMI may translate to  
371 increased load-bearing requirements during daily activities increasing muscle  
372 mass.(76) Secondly, a higher BMI may be due to better nutritional intake with a study

373 showing associations between BMI and total protein intake.(77) Thirdly, BMI is likely  
374 an inadequate surrogate measure of adiposity in older adults.(78, 79) In fact,  
375 sarcopenic obesity (SO) prevalence defined with BMI underestimates those defined  
376 by body fat percentages in the same cohort in a study.(74) Interestingly, a higher BMI  
377 range, confers a paradoxical survival benefit in older adults.(80, 81) A study comparing  
378 all-cause mortality within the same cohort between groups with BMI v.s. body fat  
379 percentage measurements showed no increased mortality risk in apparently obese  
380 category of BMI while those defined obese with body fat percentage measurements  
381 did.(82)

382 Perhaps it is time to reconsider the utility of previously accepted BMI range pre-  
383 defined in Asians older adults. Despite the limitations of BMI as a surrogate measure  
384 of body fat composition, it is undeniably an easily obtainable measure in a busy setting  
385 with limited resources. However, there is a research gap in defining what is a normal  
386 BMI range correlating to sarcopenic outcomes in long term prospective prognosis  
387 studies.

388

389 It may also be timely to standardise the definition of sarcopenic obesity using body  
390 fat percentages norms in future Delphi consensus studies among content experts.

391 However more studies need to be done to correctly classify obesity using body fat  
392 percentage adjusted for sex, age and race. Aligning sarcopenic obesity diagnostic

393 criteria will stimulate further research in this area and allow for confident synthesis of  
394 data outcomes across different studies. This will pave the way for interventional trials.

395

396 In our study, cognitively impaired participants have a higher odd of severe sarcopenia  
397 although not to sarcopenia while global literature found an association between

398 cognitive impairment and sarcopenia.(83) We believe the loss of association of  
399 cognitive impairment with sarcopenia could be due to type 2 error.

400 Our study did not find an association between categories of nutritional risks and  
401 sarcopenia on multivariate analysis although there was a statistically significant  
402 association on univariate analysis. Again, this could be due to type 2 error. An  
403 alternative explanation is because of the inherent differential property of a screening  
404 tool and a full diagnostic assessment of nutritional state. For example, a study showed  
405 GLIM assessment of nutrition predicted sarcopenia among malnourished participants  
406 while a screening tool failed to do so.(84)

407

408 To our knowledge, this is the first inpatient study in Singapore to report sarcopenia  
409 prevalence using AWGS diagnostic criteria. Our study affirms some of the common  
410 associations associated with sarcopenia in line with global literature. This  
411 foundational evidence will provide the possibility of developing technology or artificial  
412 intelligence driven case finding for sarcopenia in an inpatient setting via a risk  
413 calculator. This is especially important as clinicians face challenges with equipment  
414 and manpower investiture with current diagnostic criteria of sarcopenia. Our study  
415 will also provide the basis for future intervention targeted at risk factors in our  
416 population to modify sarcopenic outcomes.

417 Some other strengths of our study include a reasonably large number of recruitments  
418 with low dropouts and missing data, as well as the consecutive sampling methodology  
419 for all patients admitted to OCH to achieve a more representative sample of the  
420 population.

421

422 *Limitations*

423 This study has several limitations. Our single site study participants may not be  
424 reflective of inpatients in other post-acute settings in other countries. Our findings  
425 cannot be generalized to those with participants characteristics that were excluded  
426 as per study protocol. Additionally, causal relationship of the associated factors  
427 cannot be established as it is a cross-sectional study.

428 Our study estimated appendicular lean mass using the InBody S10 BIA which was not  
429 validated locally. However, the use of a multifrequency BIA is an accepted method of  
430 measurement by AWGS2019 with gender-specific cut-offs. The team utilised the  
431 InBody S10 for its ability to perform measurements in a supine position, enabling  
432 assessment among participants with functional limitations. Additionally, utilisation of  
433 a BIA machine will allow for comparative data in future interventional studies  
434 spanning across inpatient to the community, where access to DXA may be difficult.

435 The Jamar hydraulic hand dynamometer is the recommended brand for assessing  
436 handgrip strength, however this study utilised the Baseline hydraulic hand  
437 dynamometer instead for logistical reasons as multiple sets were readily available and  
438 routinely used by the rehabilitation department therapists, who were the assessors  
439 of handgrip for this study. The Baseline dynamometer has been validated against the  
440 Jamar dynamometer to measure equivalently and hence can be used  
441 interchangeably(85).

442

## 443 Conclusions

444 Our study found a high level of sarcopenia among inpatient older adults. We also  
445 found that participants with increased age, male gender, and a lower physical activity  
446 level were more likely to be sarcopenic, while those who had a higher hip  
447 circumference and higher BMI of 27.5 and above were less likely to be sarcopenic. In

448 addition, cognitively impaired participants were more likely to be severely sarcopenic.  
449 There is an urgent need to address the burgeoning burden with sarcopenia and  
450 identify patients at higher risk of sarcopenia in post-acute settings in Singapore for  
451 early intervention.

452

453 Acknowledgements: Nil

454 Conflict of interest: The authors declare no conflict of interest.

455

456 Author's contributions: Charmaine Tan was the study's principal investigator. J Aw  
457 and Charmaine Tan were responsible for the conception of the study. J Aw, SSYS,  
458 Doris L., Ganeshan K and LL Low were the co-investigators. J Aw and Charmaine Tan  
459 were responsible for the study design. Charmaine Tan and SSYS were responsible  
460 mainly in the coordination of the training of the interviewers. J Aw, Charmaine Tan,  
461 XL Low, HY Quek and Andrea Ong took consent from the participants. XL Low, HY  
462 Quek and Andrea Ong were responsible for double checking data collected. Doris L.,  
463 SV Koh and Ganeshan K. were responsible for the measurement of participants for  
464 sarcopenia. J Aw, Charmaine Tan, SSYS and Olivia Xia cleaned the data and double  
465 checked the data output to ensure validity of the data. J Aw and Charmaine Tan  
466 provided the initial draft of the manuscript. J Aw, Charmaine Tan, LL Low, SSYS and  
467 Olivia Xia played a role in the interpretation of the data and revision of manuscript  
468 critically for important intellectual content and agreed to the final submission.

469



470 Financial disclosure:

471 This study was funded by the 2021 SingHealth Regional Health System (RHS),  
472 Population-based, Unified, Learning System for Enhanced and Sustainable Health  
473 (PULSES) Grant ID: CGOCT21S06. Funds were used to recruit interns for coordinating  
474 administrative duties of the study on a day to day basis with oversight from the P.I.  
475 and Co-Is. Part of the fund was used to purchase the BIA InBody S10 and also a  
476 laptop that is encrypted to perform data analysis together with acquisition of Stata  
477 software licence.

478

## 479 **References**

- 480 1. Ageing and Health: World Health Organization; 2021 [14th Oct 2021].  
481 Available from: [https://www.who.int/news-room/fact-sheets/detail/ageing-and-](https://www.who.int/news-room/fact-sheets/detail/ageing-and-health)  
482 [health](https://www.who.int/news-room/fact-sheets/detail/ageing-and-health).
- 483 2. Elderly, Youth and Gender Profile: Department of Statistics, Singapore; 2021  
484 [Available from: [https://www.singstat.gov.sg/find-data/search-by-](https://www.singstat.gov.sg/find-data/search-by-theme/population/elderly-youth-and-gender-profile/latest-data)  
485 [theme/population/elderly-youth-and-gender-profile/latest-data](https://www.singstat.gov.sg/find-data/search-by-theme/population/elderly-youth-and-gender-profile/latest-data).
- 486 3. Cao X, Hou Y, Zhang X, Xu C, Jia P, Sun X, et al. A comparative, correlate  
487 analysis and projection of global and regional life expectancy, healthy life  
488 expectancy, and their GAP: 1995-2025. *J Glob Health*. 2020;10(2):020407.
- 489 4. Decade of Healthy Ageing: Plan of Action. World Health Organization; 2020.  
490 p. 1-26.
- 491 5. Lauretani F, Russo CR, Bandinelli S, Bartali B, Cavazzini C, Di Iorio A, et al.  
492 Age-associated changes in skeletal muscles and their effect on mobility: an  
493 operational diagnosis of sarcopenia. *J Appl Physiol* (1985). 2003;95(5):1851-60.
- 494 6. Mitchell WK, Williams J, Atherton P, Larvin M, Lund J, Narici M. Sarcopenia,  
495 dynapenia, and the impact of advancing age on human skeletal muscle size and  
496 strength; a quantitative review. *Front Physiol*. 2012;3:260.
- 497 7. Buch A, Carmeli E, Boker LK, Marcus Y, Shefer G, Kis O, et al. Muscle function  
498 and fat content in relation to sarcopenia, obesity and frailty of old age--An overview.  
499 *Exp Gerontol*. 2016;76:25-32.
- 500 8. Aw J, Lee ES, Chiang G, Tan BY. A study on prevalence and associations of  
501 non-robustness in older adults aged 65 years and above attending a general  
502 practitioner clinic in Ang Mo Kio. *Singapore Med J*. 2021;62(6):311-4.
- 503 9. Beaudart C, Zaaria M, Pasleau F, Reginster JY, Bruyère O. Health Outcomes  
504 of Sarcopenia: A Systematic Review and Meta-Analysis. *PLoS One*.  
505 2017;12(1):e0169548.
- 506 10. Cruz-Jentoft AJ, Bahat G, Bauer J, Boirie Y, Bruyère O, Cederholm T, et al.  
507 Sarcopenia: revised European consensus on definition and diagnosis. *Age Ageing*.  
508 2019;48(1):16-31.
- 509 11. Xu J, Reijnierse EM, Pacifico J, Wan CS, Maier AB. Sarcopenia is associated  
510 with 3-month and 1-year mortality in geriatric rehabilitation inpatients: RESORT. *Age*  
511 *Ageing*. 2021;50(6):2147-56.

- 512 12. Janssen I, Shepard DS, Katzmarzyk PT, Roubenoff R. The healthcare costs of  
513 sarcopenia in the United States. *J Am Geriatr Soc.* 2004;52(1):80-5.
- 514 13. Yoshimura Y, Wakabayashi H, Bise T, Nagano F, Shimazu S, Shiraishi A, et al.  
515 Sarcopenia is associated with worse recovery of physical function and dysphagia and  
516 a lower rate of home discharge in Japanese hospitalized adults undergoing  
517 convalescent rehabilitation. *Nutrition.* 2019;61:111-8.
- 518 14. Pagotto V, Silveira EA. Methods, diagnostic criteria, cutoff points, and  
519 prevalence of sarcopenia among older people. *ScientificWorldJournal.*  
520 2014;2014:231312.
- 521 15. Yoshimura Y, Wakabayashi H, Bise T, Tanoue M. Prevalence of sarcopenia  
522 and its association with activities of daily living and dysphagia in convalescent  
523 rehabilitation ward inpatients. *Clin Nutr.* 2018;37(6 Pt A):2022-8.
- 524 16. Sánchez-Rodríguez D, Marco E, Miralles R, Guillén-Solà A, Vázquez-Ibar O,  
525 Escalada F, et al. Does gait speed contribute to sarcopenia case-finding in a  
526 postacute rehabilitation setting? *Arch Gerontol Geriatr.* 2015;61(2):176-81.
- 527 17. Sawaya Y, Ishizaka M, Kubo A, Shiba T, Hirose T, Onoda K, et al. The Asian  
528 working group for sarcopenia's new criteria updated in 2019 causing a change in  
529 sarcopenia prevalence in Japanese older adults requiring long-term care/support. *J*  
530 *Phys Ther Sci.* 2020;32(11):742-7.
- 531 18. Chang CF, Yeh YL, Chang HY, Tsai SH, Wang JY. Prevalence and Risk Factors  
532 of Sarcopenia among Older Adults Aged  $\geq 65$  Years Admitted to Daycare Centers of  
533 Taiwan: Using AWGS 2019 Guidelines. *Int J Environ Res Public Health.* 2021;18(16).
- 534 19. Fung FY, Koh YLE, Malhotra R, Ostbye T, Lee PY, Shariff Ghazali S, et al.  
535 Prevalence of and factors associated with sarcopenia among multi-ethnic  
536 ambulatory older Asians with type 2 diabetes mellitus in a primary care setting. *BMC*  
537 *Geriatr.* 2019;19(1):122.
- 538 20. Lu Y, Karagounis LG, Ng TP, Carre C, Narang V, Wong G, et al. Systemic and  
539 Metabolic Signature of Sarcopenia in Community-Dwelling Older Adults. *J Gerontol A*  
540 *Biol Sci Med Sci.* 2020;75(2):309-17.
- 541 21. Pang BWJ, Wee SL, Lau LK, Jabbar KA, Seah WT, Ng DHM, et al. Prevalence  
542 and Associated Factors of Sarcopenia in Singaporean Adults-The Yishun Study. *J Am*  
543 *Med Dir Assoc.* 2021;22(4):885.e1-.e10.
- 544 22. Chew STH, Tey SL, Yalawar M, Liu Z, Baggs G, How CH, et al. Prevalence and  
545 associated factors of sarcopenia in community-dwelling older adults at risk of  
546 malnutrition. *BMC Geriatr.* 2022;22(1):997.
- 547 23. Keng BMH, Gao F, Teo LLY, Lim WS, Tan RS, Ruan W, et al. Associations  
548 between Skeletal Muscle and Myocardium in Aging: A Syndrome of "Cardio-  
549 Sarcopenia"? *J Am Geriatr Soc.* 2019;67(12):2568-73.
- 550 24. Gao Q, Hu K, Yan C, Zhao B, Mei F, Chen F, et al. Associated Factors of  
551 Sarcopenia in Community-Dwelling Older Adults: A Systematic Review and Meta-  
552 Analysis. *Nutrients.* 2021;13(12).
- 553 25. Tan LF, Lim ZY, Choe R, Seetharaman S, Merchant R. Screening for Frailty  
554 and Sarcopenia Among Older Persons in Medical Outpatient Clinics and its  
555 Associations With Healthcare Burden. *J Am Med Dir Assoc.* 2017;18(7):583-7.
- 556 26. Ministry of Health S. Community Hospital Care - Handbook for Patients.  
557 2017.
- 558 27. Bull FC, Maslin TS, Armstrong T. Global physical activity questionnaire  
559 (GPAQ): nine country reliability and validity study. *J Phys Act Health.* 2009;6(6):790-  
560 804.

- 561 28. Chu AH, Ng SH, Koh D, Müller-Riemenschneider F. Reliability and Validity of  
562 the Self- and Interviewer-Administered Versions of the Global Physical Activity  
563 Questionnaire (GPAQ). *PLoS One*. 2015;10(9):e0136944.
- 564 29. Win AM, Yen LW, Tan KH, Lim RB, Chia KS, Mueller-Riemenschneider F.  
565 Patterns of physical activity and sedentary behavior in a representative sample of a  
566 multi-ethnic South-East Asian population: a cross-sectional study. *BMC Public*  
567 *Health*. 2015;15:318.
- 568 30. Chu AHY, Ng SHX, Koh D, Müller-Riemenschneider F. Domain-Specific Adult  
569 Sedentary Behaviour Questionnaire (ASBQ) and the GPAQ Single-Item Question: A  
570 Reliability and Validity Study in an Asian Population. *Int J Environ Res Public Health*.  
571 2018;15(4).
- 572 31. National Health Survey 2010. Epidemiology & Disease Control Division  
573 Ministry of Health, Singapore
- 574 32. National Population Health Survey 2019. Household Interview: Epidemiology  
575 & Disease Control Division and Policy, Research & Surveillance Group  
576 Ministry of Health and Health Promotion Board, Singapore.
- 577 33. Global Physical Activity Questionnaire (GPAQ) Analysis Guide. World Health  
578 Organization.
- 579 34. Lim SL, Tong CY, Ang E, Lee EJ, Loke WC, Chen Y, et al. Development and  
580 validation of 3-Minute Nutrition Screening (3-MinNS) tool for acute hospital patients  
581 in Singapore. *Asia Pac J Clin Nutr*. 2009;18(3):395-403.
- 582 35. Lim SL, Ang E, Foo YL, Ng LY, Tong CY, Ferguson M, et al. Validity and  
583 reliability of nutrition screening administered by nurses. *Nutr Clin Pract*.  
584 2013;28(6):730-6.
- 585 36. Sahadevan S, Lim PP, Tan NJ, Chan SP. Diagnostic performance of two  
586 mental status tests in the older chinese: influence of education and age on cut-off  
587 values. *Int J Geriatr Psychiatry*. 2000;15(3):234-41.
- 588 37. Ng TP, Niti M, Chiam PC, Kua EH. Ethnic and educational differences in  
589 cognitive test performance on mini-mental state examination in Asians. *Am J Geriatr*  
590 *Psychiatry*. 2007;15(2):130-9.
- 591 38. Appropriate body-mass index for Asian populations and its implications for  
592 policy and intervention strategies. *Lancet*. 2004;363(9403):157-63.
- 593 39. Alberti KG, Zimmet P, Shaw J. Metabolic syndrome--a new world-wide  
594 definition. A Consensus Statement from the International Diabetes Federation.  
595 *Diabet Med*. 2006;23(5):469-80.
- 596 40. Organization WH. Waist circumference and waist-hip ratio: report of a WHO  
597 expert consultation. Geneva 8-11 December 2008.
- 598 41. World Health Organization, Regional Office for the Western Pacific. The  
599 Asia-Pacific perspective : redefining obesity and its treatment. Sydney: Health  
600 Communications Australia 2000.
- 601 42. Cruz-Jentoft AJ, Baeyens JP, Bauer JM, Boirie Y, Cederholm T, Landi F, et al.  
602 Sarcopenia: European consensus on definition and diagnosis: Report of the  
603 European Working Group on Sarcopenia in Older People. *Age Ageing*.  
604 2010;39(4):412-23.
- 605 43. Chen LK, Liu LK, Woo J, Assantachai P, Auyeung TW, Bahyah KS, et al.  
606 Sarcopenia in Asia: consensus report of the Asian Working Group for Sarcopenia. *J*  
607 *Am Med Dir Assoc*. 2014;15(2):95-101.
- 608 44. Chen LK, Woo J, Assantachai P, Auyeung TW, Chou MY, Iijima K, et al. Asian  
609 Working Group for Sarcopenia: 2019 Consensus Update on Sarcopenia Diagnosis and  
610 Treatment. *J Am Med Dir Assoc*. 2020;21(3):300-7.e2.

- 611 45. Kyle UG, Bosaeus I, De Lorenzo AD, Deurenberg P, Elia M, Manuel Gómez J,  
612 et al. Bioelectrical impedance analysis-part II: utilization in clinical practice. *Clin Nutr.*  
613 2004;23(6):1430-53.
- 614 46. Fess EE, Moran CA. American Society of Hand Therapists Clinical Assessment  
615 Recommendations. United States of America August 1981. 17 p.
- 616 47. Prosthetists AAoOa. Five Time Sit to Stand Test (FTSST). 2017. p.  
617 <https://www.youtube.com/watch?v=jPI-luRJ5A>.
- 618 48. Lardiés-Sánchez B, Sanz-Paris A, Boj-Carceller D, Cruz-Jentoft AJ. Systematic  
619 review: Prevalence of sarcopenia in ageing people using bioelectrical impedance  
620 analysis to assess muscle mass. *European Geriatric Medicine.* 2016;7(3):256-61.
- 621 49. Yuan S, Larsson SC. Epidemiology of sarcopenia: Prevalence, risk factors, and  
622 consequences. *Metabolism.* 2023;144:155533.
- 623 50. Wilkinson DJ, Piasecki M, Atherton PJ. The age-related loss of skeletal  
624 muscle mass and function: Measurement and physiology of muscle fibre atrophy  
625 and muscle fibre loss in humans. *Ageing Res Rev.* 2018;47:123-32.
- 626 51. Cruz-Jentoft AJ, Sayer AA. Sarcopenia. *Lancet.* 2019;393(10191):2636-46.
- 627 52. Marcus RL, Addison O, Kidde JP, Dibble LE, Lastayo PC. Skeletal muscle fat  
628 infiltration: impact of age, inactivity, and exercise. *J Nutr Health Aging.*  
629 2010;14(5):362-6.
- 630 53. Verdijk LB, Snijders T, Drost M, Delhaas T, Kadi F, van Loon LJ. Satellite cells  
631 in human skeletal muscle; from birth to old age. *Age (Dordr).* 2014;36(2):545-7.
- 632 54. Dalle S, Rossmeislova L, Koppo K. The Role of Inflammation in Age-Related  
633 Sarcopenia. *Front Physiol.* 2017;8:1045.
- 634 55. Biolo G, Cederholm T, Muscaritoli M. Muscle contractile and metabolic  
635 dysfunction is a common feature of sarcopenia of aging and chronic diseases: From  
636 sarcopenic obesity to cachexia. *Clinical Nutrition.* 2014;33(5):737-48.
- 637 56. Sayer AA, Syddall HE, Gilbody HJ, Dennison EM, Cooper C. Does sarcopenia  
638 originate in early life? Findings from the Hertfordshire cohort study. *J Gerontol A*  
639 *Biol Sci Med Sci.* 2004;59(9):M930-4.
- 640 57. Patel HP, Syddall HE, Martin HJ, Stewart CE, Cooper C, Sayer AA.  
641 Hertfordshire sarcopenia study: design and methods. *BMC Geriatr.* 2010;10:43.
- 642 58. Ren X, Zhang X, He Q, Du L, Chen K, Chen S, et al. Prevalence of sarcopenia in  
643 Chinese community-dwelling elderly: a systematic review. *BMC Public Health.*  
644 2022;22(1):1702.
- 645 59. Tay L, Ding YY, Leung BP, Ismail NH, Yeo A, Yew S, et al. Sex-specific  
646 differences in risk factors for sarcopenia amongst community-dwelling older adults.  
647 *Age (Dordr).* 2015;37(6):121.
- 648 60. Sattler FR, Castaneda-Sceppa C, Binder EF, Schroeder ET, Wang Y, Bhasin S,  
649 et al. Testosterone and growth hormone improve body composition and muscle  
650 performance in older men. *J Clin Endocrinol Metab.* 2009;94(6):1991-2001.
- 651 61. Goodpaster BH, Park SW, Harris TB, Kritchevsky SB, Nevitt M, Schwartz AV,  
652 et al. The Loss of Skeletal Muscle Strength, Mass, and Quality in Older Adults: The  
653 Health, Aging and Body Composition Study. *The Journals of Gerontology: Series A.*  
654 2006;61(10):1059-64.
- 655 62. Shimokata H, Ando F, Yuki A, Otsuka R. Age-related changes in skeletal  
656 muscle mass among community-dwelling Japanese: a 12-year longitudinal study.  
657 *Geriatr Gerontol Int.* 2014;14 Suppl 1:85-92.
- 658 63. Gallagher D, Visser M, De Meersman RE, Sepúlveda D, Baumgartner RN,  
659 Pierson RN, et al. Appendicular skeletal muscle mass: effects of age, gender, and  
660 ethnicity. *J Appl Physiol (1985).* 1997;83(1):229-39.

- 661 64. Mouser JG, Loprinzi PD, Loenneke JP. The association between physiologic  
662 testosterone levels, lean mass, and fat mass in a nationally representative sample of  
663 men in the United States. *Steroids*. 2016;115:62-6.
- 664 65. LeBlanc ES, Wang PY, Lee CG, Barrett-Connor E, Cauley JA, Hoffman AR, et  
665 al. Higher Testosterone Levels Are Associated with Less Loss of Lean Body Mass in  
666 Older Men. *The Journal of Clinical Endocrinology & Metabolism*. 2011;96(12):3855-  
667 63.
- 668 66. Steffl M, Bohannon RW, Sontakova L, Tufano JJ, Shiells K, Holmerova I.  
669 Relationship between sarcopenia and physical activity in older people: a systematic  
670 review and meta-analysis. *Clin Interv Aging*. 2017;12:835-45.
- 671 67. Hughes VA, Roubenoff R, Wood M, Frontera WR, Evans WJ, Fiatarone Singh  
672 MA. Anthropometric assessment of 10-y changes in body composition in the elderly.  
673 *Am J Clin Nutr*. 2004;80(2):475-82.
- 674 68. Shephard RJ, Park H, Park S, Aoyagi Y. Objectively measured physical activity  
675 and progressive loss of lean tissue in older Japanese adults: longitudinal data from  
676 the Nakanojo study. *J Am Geriatr Soc*. 2013;61(11):1887-93.
- 677 69. Yoo SZ, No MH, Heo JW, Park DH, Kang JH, Kim SH, et al. Role of exercise in  
678 age-related sarcopenia. *J Exerc Rehabil*. 2018;14(4):551-8.
- 679 70. Janghorbani M, Momeni F, Dehghani M. Hip circumference, height and risk  
680 of type 2 diabetes: systematic review and meta-analysis. *Obes Rev*.  
681 2012;13(12):1172-81.
- 682 71. Jayedi A, Soltani S, Zargar MS, Khan TA, Shab-Bidar S. Central fatness and  
683 risk of all cause mortality: systematic review and dose-response meta-analysis of 72  
684 prospective cohort studies. *Bmj*. 2020;370:m3324.
- 685 72. Snijder MB, Dekker JM, Visser M, Bouter LM, Stehouwer CD, Kostense PJ, et  
686 al. Associations of hip and thigh circumferences independent of waist circumference  
687 with the incidence of type 2 diabetes: the Hoorn Study. *Am J Clin Nutr*.  
688 2003;77(5):1192-7.
- 689 73. Curtis M, Swan L, Fox R, Warters A, O'Sullivan M. Associations between Body  
690 Mass Index and Probable Sarcopenia in Community-Dwelling Older Adults.  
691 *Nutrients*. 2023;15(6).
- 692 74. Liu C, Cheng KY, Tong X, Cheung WH, Chow SK, Law SW, et al. The role of  
693 obesity in sarcopenia and the optimal body composition to prevent against  
694 sarcopenia and obesity. *Front Endocrinol (Lausanne)*. 2023;14:1077255.
- 695 75. Linge J, Heymsfield SB, Dahlqvist Leinhard O. On the Definition of Sarcopenia  
696 in the Presence of Aging and Obesity-Initial Results from UK Biobank. *J Gerontol A*  
697 *Biol Sci Med Sci*. 2020;75(7):1309-16.
- 698 76. Abramowitz MK, Hall CB, Amodu A, Sharma D, Androga L, Hawkins M.  
699 Muscle mass, BMI, and mortality among adults in the United States: A population-  
700 based cohort study. *PLoS One*. 2018;13(4):e0194697.
- 701 77. Moon K, Krems C, Heuer T, Hoffmann I. Association between body mass  
702 index and macronutrients differs along the body mass index range of German adults:  
703 results from the German National Nutrition Survey II. *J Nutr Sci*. 2021;10:e8.
- 704 78. Xu Z, Liu Y, Yan C, Yang R, Xu L, Guo Z, et al. Measurement of visceral fat and  
705 abdominal obesity by single-frequency bioelectrical impedance and CT: a cross-  
706 sectional study. *BMJ Open*. 2021;11(10):e048221.
- 707 79. Batsis JA, Mackenzie TA, Bartels SJ, Sahakyan KR, Somers VK, Lopez-Jimenez  
708 F. Diagnostic accuracy of body mass index to identify obesity in older adults:  
709 NHANES 1999-2004. *Int J Obes (Lond)*. 2016;40(5):761-7.
- 710 80. Winter JE, MacInnis RJ, Wattanapenpaiboon N, Nowson CA. BMI and all-  
711 cause mortality in older adults: a meta-analysis. *Am J Clin Nutr*. 2014;99(4):875-90.

- 712 81. Donini LM, Pinto A, Giusti AM, Lenzi A, Poggiogalle E. Obesity or BMI  
713 Paradox? Beneath the Tip of the Iceberg. *Front Nutr.* 2020;7:53.
- 714 82. Padwal R, Leslie WD, Lix LM, Majumdar SR. Relationship Among Body Fat  
715 Percentage, Body Mass Index, and All-Cause Mortality: A Cohort Study. *Ann Intern*  
716 *Med.* 2016;164(8):532-41.
- 717 83. Ohta T, Sasai H, Osuka Y, Kojima N, Abe T, Yamashita M, et al. Age- and sex-  
718 specific associations between sarcopenia severity and poor cognitive function  
719 among community-dwelling older adults in Japan: The IRIDE Cohort Study. *Frontiers*  
720 *in Public Health.* 2023;11.
- 721 84. Lengelé L, Bruyère O, Beaudart C, Reginster J-Y, Locquet M. Malnutrition,  
722 assessed by the Global Leadership Initiative on Malnutrition (GLIM) criteria but not  
723 by the mini nutritional assessment (MNA), predicts the incidence of sarcopenia over  
724 a 5-year period in the SarcoPhAge cohort. *Aging Clinical and Experimental Research.*  
725 2021;33(6):1507-17.
- 726 85. Mathiowetz V, Vizenor L, Melander D. Comparison of Baseline Instruments  
727 to the Jamar Dynamometer and the B&L Engineering Pinch Gauge. *The Occupational*  
728 *Therapy Journal of Research.* 2000;20(3):147-62.
- 729

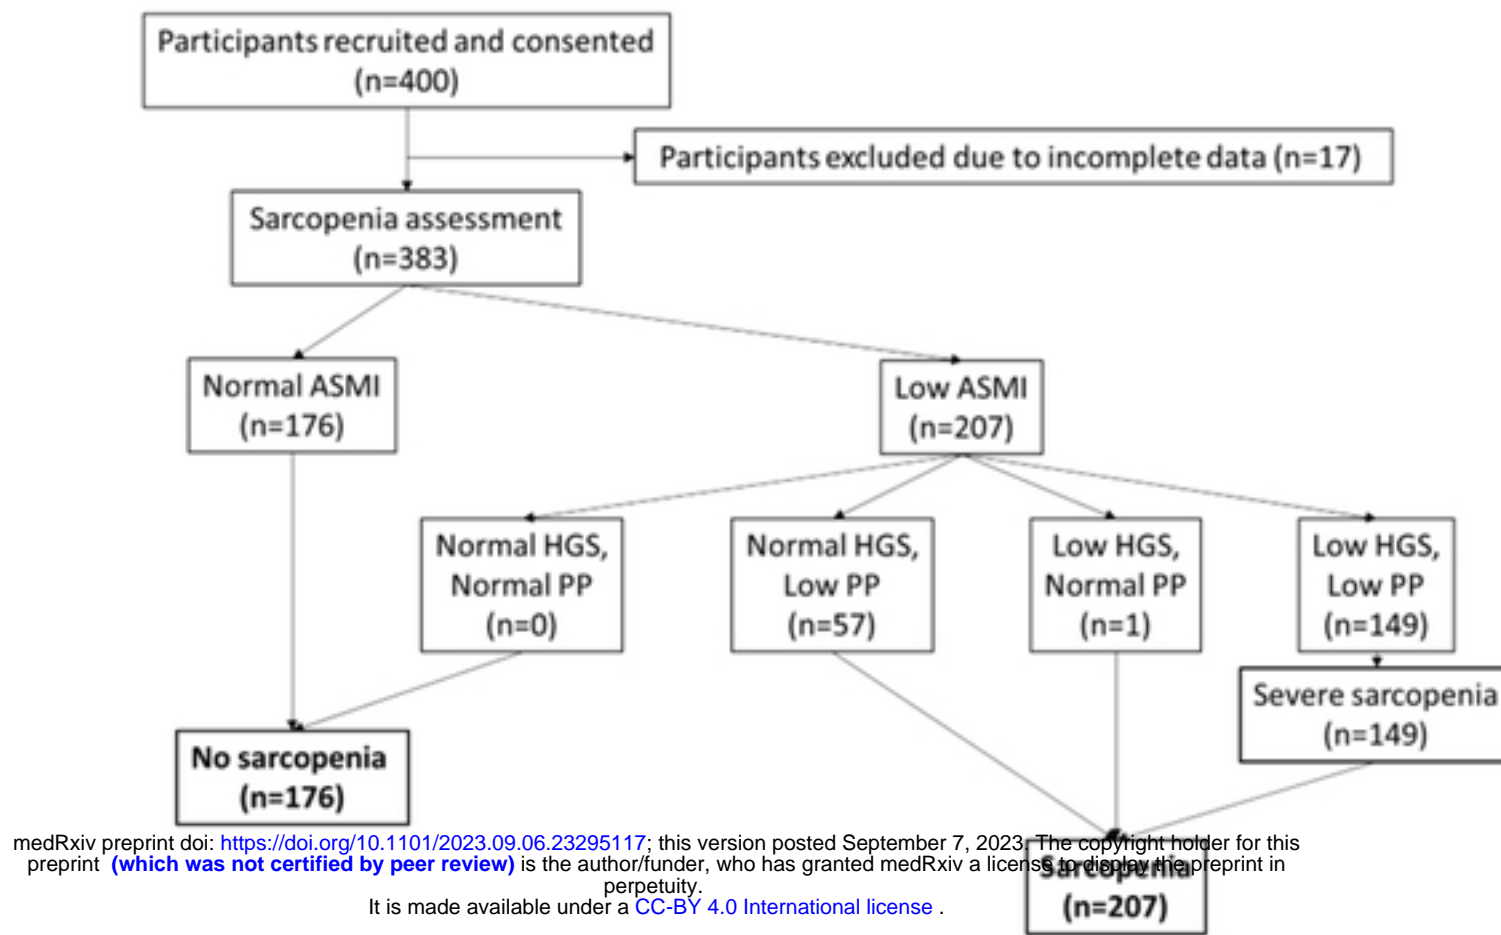

Figure 1: Process of identifying sarcopenia in our study population using Asian Working Group for Sarcopenia (AWGS) 2019 criteria (ASMI: appendicular skeletal muscle mass index; HGS: handgrip strength; PP: physical performance)
